# Supplementary material for: Relationship of Vessel Density to Vessel Length Density in Patients with Treated Fabry Disease
Source: MDPI journal article supplement (doi:10.3390/diagnostics13071227), 2023-03-24
Supplement: s1 [file s1]

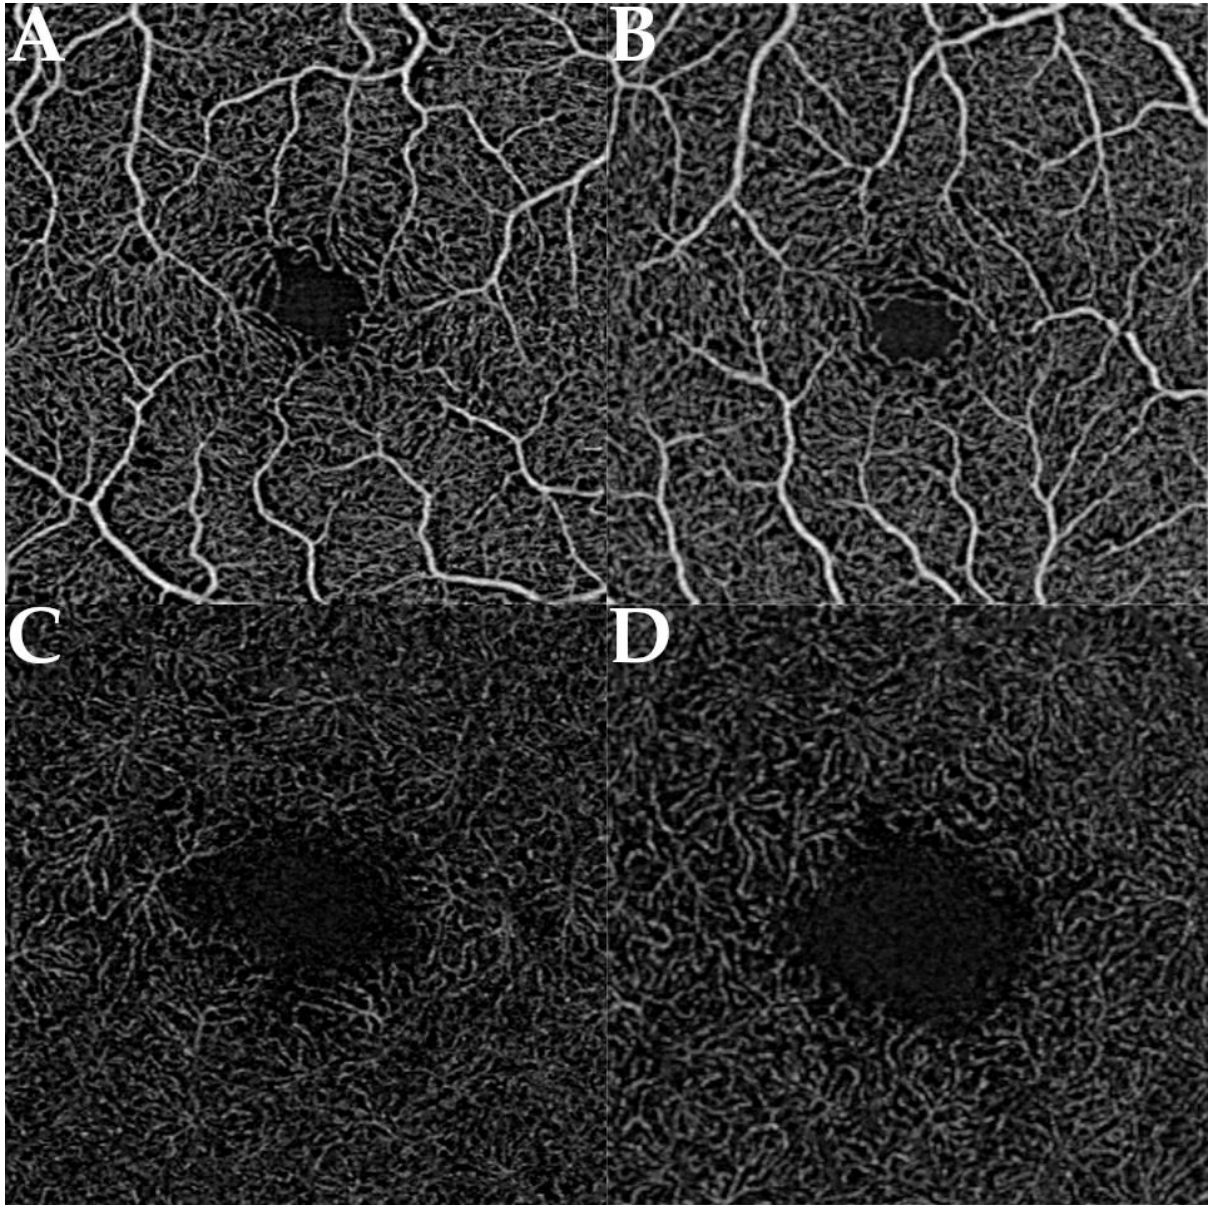

*Legend: A: Superficial capillary plexus (SCP) segmentation of a Fabry Disease (FD) patient; B SCP of a healthy control (HC) patient; C: Deep capillary plexus (DCP) segmentation of a FD patient; DCP segmentation of a HC patient.*

**Supplemental Figure S1.** Example Optical Coherence Tomography Angiography Segmentations of a Fabry Disease (FD) and Healthy Control (HC) Patient. In this figure, no macroscopic differences allowing the obvious classification into FD or HC status can be appreciated.
